# Supplementary material for: Measurement report: Fast photochemical production of peroxyacetyl nitrate (PAN) over the rural North China Plain during cold-season haze events
Source: Copernicus journal article supplement (doi:10.5194/acp-2021-359), 2021-06-23
Supplement: Supplementary file 1 [file acp-2021-359-supplement.pdf]

*Supporting Information for:*

## **Measurement report: Fast photochemical production of peroxyacetyl nitrate (PAN) over the rural North China Plain during cold-season haze events**

Yulu Qiu<sup>1,2,3,4</sup>, Zhiqiang Ma<sup>1,3,4,\*</sup>, Ke Li<sup>5</sup>, Mengyu Huang<sup>6</sup>, Jiujiang Sheng<sup>6</sup>, Ping Tian<sup>6</sup>, Jia Zhu<sup>2</sup>, Weiwei Pu<sup>3,4</sup>, Yingxiao Tang<sup>7</sup>, Tingting Han<sup>3,4</sup>, Huaigang Zhou<sup>3,4</sup>, and Hong Liao<sup>2</sup>

<sup>1</sup>Institute of Urban Meteorology, China Meteorological Administration, Beijing, 100089, China

<sup>2</sup>Collaborative Innovation Center of Atmospheric Environment and Equipment Technology, Jiangsu Key Laboratory of Atmospheric Environment Monitoring and Pollution Control (AEMPC), School of Environmental Science and Engineering, Nanjing University of Information Science & Technology, Nanjing, 210044, China

<sup>3</sup>Beijing Shangdianzi Regional Atmosphere Watch Station, Beijing, 101507, China

<sup>4</sup>Environmental Meteorology Forecast Center of Beijing-Tianjin-Hebei, Beijing, 100089, China

<sup>5</sup>John A. Paulson School of Engineering and Applied Sciences, Harvard University, Cambridge, MA 02138, USA

<sup>6</sup>Beijing Weather Modification Office, Beijing, 100089, China

<sup>7</sup>Tianjin Environmental Meteorology Center, Tianjin, 300074, China

*Correspondence to:* Zhiqiang Ma (zqma@ium.cn)

### **Contents:**

Calculation method of physical impacts and local chemical formation of PAN (**Method S1**); Calculation of HO<sub>x</sub> production rates through three pathways (**Method S2**); Instrument parameters (**Table S1**); Previously reported PAN levels in China (**Table S2**); Comparisons between HO<sub>2</sub>+NO and HO<sub>2</sub>+HO<sub>2</sub> (**Table S3**); Previously reported HCHO levels in China (**Table S4**); PAN changes due to physical and chemical processes (**Figure S1**).

## Method S1. Calculation of physical impacts and local chemical formation of PAN

Ambient PAN concentration is affected by physical processes (such as regional transport) and local photochemical formation. Here, we define that the transport impacts are restricted to PAN itself, exclusive of PAN's precursors. Thus, the change rate of PAN concentration ( $\frac{d[\text{PAN}]}{dt}$ ) is the sum of net chemical production ( $\frac{d[\text{Chem}]}{dt}$ ) and physical changes ( $\frac{d[\text{Phys}]}{dt}$ ) as shown in Eq.1. The ratio of changes in PAN concentration due to physical processes to the base concentration is assumed to be identical with the change ratio of CO (Eq.2), as CO is usually considered as a chemically inert species and also abundant in the urban region. The net chemical production of PAN is a combined result of chemical production (P[PAN]) and thermal decomposition (L[PAN], Eq.3). PAN's thermal decomposition can be directly derived (Eq.4) and the chemical reaction rate coefficient  $k$  is temperature-dependent and obtained from Seinfeld and Pandis (2006). The chemical production of PAN (P[PAN]) can be obtained from the difference between net chemical production rate and chemical loss rate (Eq.5). In this study, we use 4 hours as  $dt$  and separate a day as morning (8:00–12:00), afternoon (12:00–16:00), evening (16:00–20:00) and night (20:00–08:00).

$$\frac{d[\text{PAN}]}{dt} = \frac{d[\text{Chem}]}{dt} + \frac{d[\text{Phys}]}{dt} \quad (\text{Eq.1})$$

$$\frac{d[\text{Phys}]}{dt} = \frac{d[\text{CO}]}{dt} \times \frac{[\text{PAN}]}{[\text{CO}]} \quad (\text{Eq.2})$$

$$\frac{d[\text{Chem}]}{dt} = \frac{d[\text{PAN}]}{dt} - \frac{d[\text{CO}]}{dt} \times \frac{[\text{PAN}]}{[\text{CO}]} = \text{P}[\text{Chem}] + \text{L}[\text{Chem}] \quad (\text{Eq.3})$$

$$\text{L}[\text{Chem}] = -k[\text{PAN}] \quad (\text{Eq.4})$$

$$\text{P}[\text{Chem}] = \frac{d[\text{PAN}]}{dt} - \frac{d[\text{CO}]}{dt} \times \frac{[\text{PAN}]}{[\text{CO}]} + k[\text{PAN}] \quad (\text{Eq.5})$$

## Method S2. Calculation of HO<sub>x</sub> production rates through three pathways

Photolysis of O<sub>3</sub>, HONO and HCHO are usually considered as the three major HO<sub>x</sub> sources. Photolysis of HONO can directly produce OH radical (R1) and its production rate of HO<sub>x</sub> (P[HO<sub>x</sub>]<sub>HONO</sub>) is the product of photolysis rate and HONO concentration (Eq. 6). O<sub>3</sub> photolysis can produce excited singlet oxygen atom (O(<sup>1</sup>D), R2), and O(<sup>1</sup>D) collides with N<sub>2</sub> or O<sub>2</sub>, quenching to its ground state (R3) or reacts with H<sub>2</sub>O to generate two OH radicals (R4). Following the estimation method in Seinfeld and Pandis (2006), the HO<sub>x</sub> production rate by O<sub>3</sub> photolysis could be derived in Eq. 7. Photolysis of HCHO directly produces H and HCO. Because of the rapid reaction between HCO (H) and O<sub>2</sub>, HCHO photolysis could be represented in R5, and the production rate of HO<sub>x</sub> is calculated following Eq. 8.

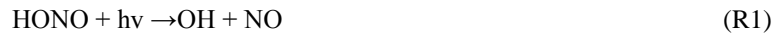

$$P[\text{HO}_x]_{\text{HONO}} = J(\text{HONO}) \times [\text{HONO}] \quad (\text{Eq.6})$$

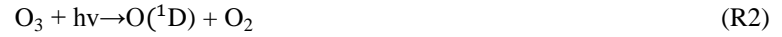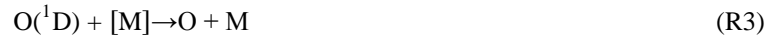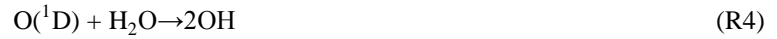

$$P[\text{HO}_x]_{\text{O}_3} = \frac{2J(\text{O}_3) \times k_4 \times [\text{H}_2\text{O}] \times [\text{O}_3]}{[\text{M}] \times k_3} \quad (\text{Eq.7})$$

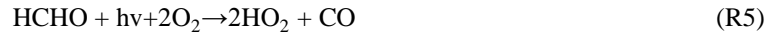

$$P[\text{HO}_x]_{\text{HCHO}} = 2J[\text{HCHO}] \times [\text{HCHO}] \quad (\text{Eq.8})$$

**Table S1.** Detailed parameters of instruments used in this study.

| Species                 | Instruments    | Time resolution | Detection limit       | Calibration frequency |
|-------------------------|----------------|-----------------|-----------------------|-----------------------|
| PAN                     | GC-ECD         | 5 min           | 20 pptv               | monthly               |
| VOCs                    | PTR-ToF-MS     | 5 min           | -                     | quarterly             |
| HONO                    | LOPAP          | 1 min           | 10 pptv               | weekly                |
| O <sub>3</sub>          | TE 49i         | 1 min           | 0.5 ppbv              | monthly               |
| NO <sub>x</sub>         | TE 42i         | 1 min           | 50 pptv               | monthly               |
| CO                      | Picarro, G2401 | 2 sec           | 40 ppbv               | monthly               |
| PM <sub>2.5</sub>       | TEOM 1405      | 5 min           | 0.1 µg/m <sup>3</sup> | -                     |
| Photolysis ( <i>J</i> ) | PFS-100        | 1 min           | -                     | quarterly             |

**Table S2.** Comparisons of PAN levels in recent studies in China with results in this study.

| Location                          | Site type       | Period                            | Conc.<br>(ppb) | Reference           |
|-----------------------------------|-----------------|-----------------------------------|----------------|---------------------|
| Jinan, Shandong, China            | Urban NCP       | Nov 2015–Jul 2016                 | 1.89±1.42      | Liu et al. (2018)   |
| Tianjin, China                    | Suburban NCP    | Sep 5–28, 2018                    | 0.93±0.57      | Qiu et al. (2019a)  |
| PKU, Beijing, China               | Urban NCP       | Jun–Jul, 2014                     | 1.5            | Zhang et al. (2017) |
| Wangdu, Hebei, China              | Rural NCP       | Jun–Jul, 2014                     | 1.7            | Zhang et al. (2017) |
| Beijing, China                    | Suburban NCP    | Jan–Feb, 2016                     | 1.04           | Zhang et al. (2019) |
| CS, Chongqing, China              | Urban site      | Aug 25–Sep 10, 2015               | 2.05           | Sun et al. (2020)   |
| NQ, Chongqing, China              | Suburban site   | Aug 25–Sep 10, 2015               | 1.08           | Sun et al. (2020)   |
| Xiamen, Fujian, China             | Suburban site   | Jan–Dec, 2018                     | 0.55           | Hu et al. (2020)    |
| Hongkong, China                   | Suburban site   | Oct–Nov, 2016                     | 0.63±0.05      | Zeng et al. (2019a) |
| Ziyang, Sichuan, China            | Urban site      | Dec, 2012                         | 0.55           | Zhu et al. (2018)   |
| Central Tibetan Plateau,<br>China | Background site | Aug17–24, 2011<br>May 15–Jul 2012 | 0.36<br>0.44   | Xu et al. (2018)    |
| SDZ, Beijing, China               | Rural NCP       | Oct, 2020                         | 1.11±0.88      | This study          |

**Table S3.** Comparisons between HO<sub>2</sub>+NO (R1) and HO<sub>2</sub>+HO<sub>2</sub> (R2) during pollution days at the SDZ site.

|                                       | $k^a$<br>(cm <sup>3</sup> molec <sup>-1</sup> s <sup>-1</sup> ) | HO <sub>2</sub> <sup>b</sup><br>(molec cm <sup>-3</sup> ) | NO or HO <sub>2</sub><br>(molec cm <sup>-3</sup> ) | Production rates <sup>c</sup><br>(molec cm <sup>-3</sup> s <sup>-1</sup> ) |
|---------------------------------------|-----------------------------------------------------------------|-----------------------------------------------------------|----------------------------------------------------|----------------------------------------------------------------------------|
| HO <sub>2</sub> +NO (R1)              | $8.4 \times 10^{-12}$                                           | $\sim 10^8$                                               | $7.1 \times 10^9$ for NO                           | $\sim 6 \times 10^6$                                                       |
| HO <sub>2</sub> +HO <sub>2</sub> (R2) | $3.3 \times 10^{-12}$                                           | $\sim 10^8$                                               | $\sim 10^8$ for HO <sub>2</sub>                    | $\sim 3.3 \times 10^4$                                                     |
| R1/R2                                 | 2.5                                                             | 1                                                         | $\sim 71$                                          | $\sim 1.8 \times 10^2$                                                     |

<sup>a</sup>.  $k$  denotes the reaction constants of R1 and R2.

<sup>b</sup>. The HO<sub>2</sub> concentration is assumed to be with a magnitude of  $10^8$  molec cm<sup>-3</sup>, which is consistent with Tan et al. (2018).

<sup>c</sup>. The production rates of R1 and R2 are calculated by  $k[\text{HO}_2][\text{NO}]$  and  $k[\text{HO}_2][\text{HO}_2]$ , respectively.

**Table S4.** Comparisons of HCHO levels in recent studies in China with results in this study.

| Location                    | Site type       | Period                      | Conc. (ppb)  | Reference           |
|-----------------------------|-----------------|-----------------------------|--------------|---------------------|
| Beijing, China              | Suburban NCP    | Summer, 2008                | 11.17 ± 5.32 | Yang et al. (2018)  |
| Beijing, China              | Suburban NCP    | October, 2006               | 7.49         | Pang et al. (2009)  |
| Beijing, China              | Urban NCP       | Summer, 2013                | 11.4 ± 5.6   | Rao et al. (2016)   |
|                             |                 | Winter, 2014                | 5.5 ± 3.9    |                     |
| Beijing, China              | Urban NCP       | Summer, 2015                | 6.9 ± 2.9    | Qian et al. (2019)  |
|                             |                 | Summer, 2018                | 8.5 ± 2.1    |                     |
|                             |                 | Winter, 2017                | 3.2 ± 2.4    |                     |
| Beijing, China              | Urban NCP       | August, 2006                | 29.2 ± 12.1  | Duan et al. (2012)  |
| Beijing, China              | Urban NCP       | December, 2016              | 18.3 ± 7.2   | Sheng et al. (2018) |
| Beijing, China              | Suburban NCP    | Autumn, 2005                | 15.8 ± 9.7   | Zhang et al. (2012) |
|                             |                 | Autumn, 2008                | 5.9 ± 3.2    |                     |
|                             |                 | Autumn, 2009                | 8.3 ± 5.8    |                     |
| Beijing, China              | Urban NCP       | November, 2014              | 14.2 ± 13.8  | Zhou et al. (2019)  |
|                             |                 | July, 2015                  | 12.8 ± 4.8   |                     |
| Wangdu, China               | Rural NCP       | Nov–Dec, 2017               | 3.7          | Wang et al. (2020)  |
| Shenzhen, Guangdong, China  | Urban site      | Spring, 2016                | 3.4 ± 1.6    | Wang et al. (2017)  |
|                             |                 | Summer, 2016                | 5.0 ± 4.4    |                     |
|                             |                 | Autumn, 2016                | 5.1 ± 3.1    |                     |
|                             |                 | Winter, 2016                | 4.2 ± 2.2    |                     |
| Wujiasha, China             | Suburban site   | August, 2016                | 2.1 ± 0.2    | Zeng et al. (2019b) |
| Ziyang, Sichuan, China      | Urban site      | August, 2016                | 2.2 ± 0.4    |                     |
| Hankou, Hubei, China        | Roadside site   | August, 2016                | 3.4 ± 0.5    |                     |
| Nanning, Guangxi, China     | Urban site      | Oct 2011–Jul 2012           | 5.6 ± 2.8    | Guo et al. (2016)   |
| Mount Tai, Shandong, China  | Background site | Summer, 2014                | 3.5 ± 1.0    | Yang et al. (2017)  |
| Wuhan, Hubei, China         | Suburban site   | Feb, Apr, July, Oct of 2017 | 3.4 ± 2.0    | Yang et al.(2019)   |
| Guangzhou, Guangdong, China | Urban site      | July, 2006                  | 7.6 ± 3.7    | Ling et al. (2017)  |
| SDZ, Beijing, China         | Rural site      | Oct., 2020                  | 4.6 ± 3.8    | This study          |

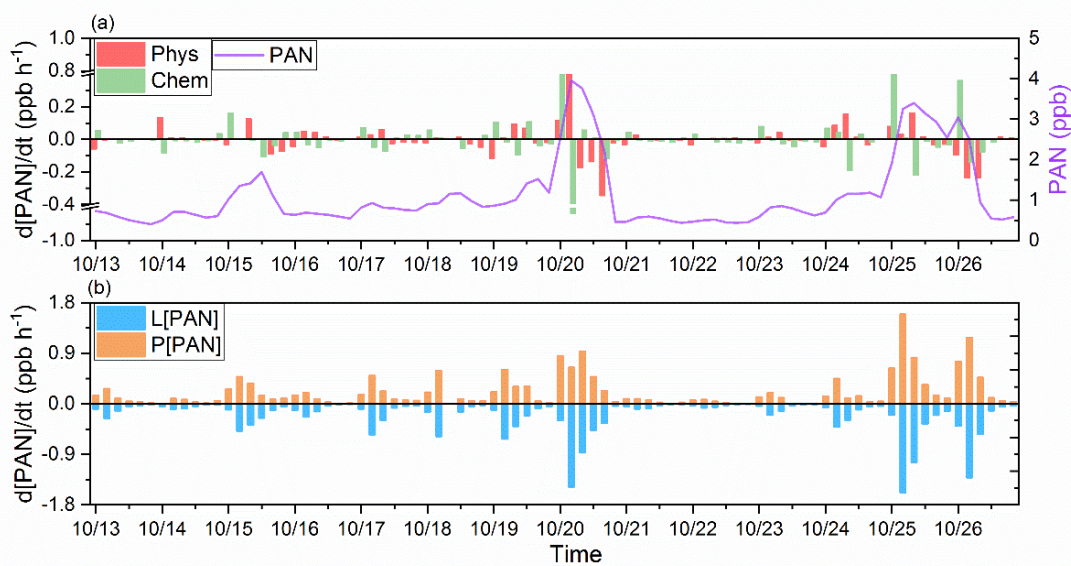

**Figure S1.** (a) Changes in PAN concentrations every four hours due to physical (Phys) and chemical (Chem) processes during the observation period at the SDZ site. (b) Chemical change rates of PAN due to chemical production (P[PAN]) and loss (L[PAN]) every four hours during the observation period at the SDZ site.
